# Supplementary material for: Response of protonated, adduct, and fragmented ions in Vocus proton-transfer-reaction time-of-flight mass spectrometer (PTR-ToF-MS)
Source: Copernicus journal article supplement (doi:10.5194/egusphere-2024-16), 2024-01-12
Supplement: Supplementary file 1 [file egusphere-2024-16-supplement.pdf]

1 Supplementary Information for

2 **Response of protonated, adduct, and fragmented ions in Vocus proton-**  
3 **transfer-reaction time-of-flight mass spectrometer (PTR-ToF-MS)**

4

5 Fangbing Li<sup>1</sup>, Dan Dan Huang<sup>2</sup>, Linhui Tian<sup>1</sup>, Bin Yuan<sup>3</sup>, Wen Tan<sup>4</sup>, Liang Zhu<sup>4</sup>,  
6 Penglin Ye<sup>5</sup>, Douglas Worsnop<sup>5</sup>, Ka In Hoi<sup>1</sup>, Kai Meng Mok<sup>1</sup>, Yong Jie Li<sup>1</sup>

7 <sup>1</sup>Department of Civil and Environmental Engineering, Department of Ocean Science  
8 and Technology, and Centre for Regional Oceans, Faculty of Science and  
9 Technology, University of Macau, Macau, China

10 <sup>2</sup>State Environmental Protection Key Laboratory of Cause and Prevention of Urban  
11 Air Pollution Complex, Shanghai Academy of Environmental Sciences, Shanghai,  
12 China

13 <sup>3</sup>Institute for Environment and Climate Research, Jinan University, Guangzhou  
14 510632, China

15 <sup>4</sup>Tofwerk AG, Nanjing, China

16 <sup>5</sup>Aerodyne Research, Inc., Billerica, Massachusetts 01821, United States

17 *Correspondence to:* Yong Jie Li (yongjieli@um.edu.mo)

18

## List of the supporting information:

19

### 20 Tables.

21 **Table S1.** The details of instrument setting experiments. ....4  
 22 Table S2. Details of the tested volatile organic compounds (VOCs). Also shown are their proton  
 23 affinity (PA) values. ....5  
 24 Table S3. Proton-transfer reaction rate constants ( $k_{\text{ptr}}$ ,  $\times 10^{-9} \text{ cm}^3 \text{ molec}^{-1} \text{ s}^{-1}$ ) from literature. 6  
 25 Table S4. The RH dependence, sensitivity, intercept of protonated adducts, and fragmented  
 26 ions. ....7

### 27 Figures.

28 Figure S1. The diagram of the RH experimental setup. MFC: mass flow controller. ....8  
 29 Figure S2. The mass spectra of aromatic hydrocarbons (benzene, toluene, m-xylene, and 1,2,4-  
 30 trimethylbenzene), and terpenoids (isoprene,  $\alpha$ -pinene, and  $\beta$ -caryophyllene) in Vocus at a  
 31 mixing ratio of  $\sim 12$  ppbv ( $\beta$ -caryophyllene 1.2 ppbv). ....9  
 32 Figure S3. The mass spectra of small aldehydes (formaldehyde and acetaldehyde), long-chain  
 33 aldehydes (n-butanal, pentanal, and hexaldehyde), and ketones (acetone, and methyl ethyl  
 34 ketone) in Vocus at a mixing ratio of  $\sim 12$  ppbv. .... 10  
 35 Figure S4. The mass spectra of unsaturated aldehydes (acrolein and methacrolein), aromatic  
 36 aldehydes (benzaldehyde and m-tolualdehyde), nitriles (acetonitrile and acrylonitrile),  
 37 and methanol in Vocus at a mixing ratio of  $\sim 12$  ppbv. .... 11  
 38 Figure S5. Time series of the protonated ion ( $\text{MH}^+$ ) signals for selected (A) VOCs and (B)  
 39 OVOCs as concentration varied from 0 to  $\sim 22$  ppbv ( $\sim 2$  ppbv for  $\beta$  caryophyllene) under  
 40 dry ( $\text{MH} \sim 5\%$ ) conditions. Note the signals were magnified by 10 times for  $\beta$ -  
 41 caryophyllene and 3 times for n-butanal, pentanal, and hexaldehyde. .... 12  
 42 Figure S6. Time series of the protonated ion ( $\text{MH}^+$ ), adduct ions ( $[\text{MH} + \text{H}_2\text{O}]^+$ ), and  
 43 fragmented ions ( $[\text{MH} - \text{H}_2\text{O}]^+$ ) and/or ( $[\text{MH} - \text{C}_x\text{H}_y]^+$ ) signals for n-butanal, pentanal,  
 44 and hexaldehyde. Note that the time in x axis is not continuous, with some periods with  
 45 noisy signals cut off. .... 13  
 46 Figure S7. The signal intensities (panels a, b, and c, and panels g, h, and i) and fractions (panels  
 47 d, e, and f, and panels j, k, and l) of protonated ion ( $\text{MH}^+$ ), adduct ions ( $[\text{MH} + \text{H}_2\text{O}]^+$ ),  
 48 and fragmented ions ( $[\text{MH} - \text{H}_2\text{O}]^+$  and  $[\text{MH} - \text{C}_x\text{H}_y]^+$ ) for  $\alpha$ -pinene as functions of E/N  
 49 ratio (a, d, g, and j), RF amplitude (b, e, h, and k), and BSQ amplitude (c, f, i, and l). The  
 50 difference between a/d and g/j is that the former fixed N ( $p = 2.0$  mbar) and varied axial  
 51 voltage (V) to change E/N ratio, while the latter fixed V (= 466 volts) and varied p (i.e.,  
 52 N) to change E/N ratio. The difference between b/e and h/k and between c/f and i/l is that  
 53 the former was at  $p = 2.0$  mbar while the latter  $p = 3.5$  mbar. If not varied, RF amplitude  
 54 was set at 500 volts and BSQ amplitude at 300 volts. .... 14  
 55 Figure S8. The signal intensities (panels a, b, and c, and panels g, h, and i) and fractions (panels  
 56 d, e, and f, and panels j, k, and l) of protonated ion ( $\text{MH}^+$ ), adduct ions ( $[\text{MH} + \text{H}_2\text{O}]^+$ ),  
 57 and fragmented ions ( $[\text{MH} - \text{H}_2\text{O}]^+$  and  $[\text{MH} - \text{C}_x\text{H}_y]^+$ ) for 1,2,4-trimethylbenzene as  
 58 functions of E/N ratio (a, d, g, and j), RF amplitude (b, e, h, and k), and BSQ amplitude  
 59 (c, f, i, and l). The difference between a/d and g/j is that the former fixed N ( $p = 2.0$  mbar)  
 60 and varied axial voltage (V) to change E/N ratio, while the latter fixed V (= 466 volts) and  
 61 varied p (i.e., N) to change E/N ratio. The difference between b/e and h/k and between c/f  
 62 and i/l is that the former was at  $p = 2.0$  mbar while the latter  $p = 3.5$  mbar. If not varied,  
 63 RF amplitude was set at 500 volts and BSQ amplitude at 300 volts. .... 15  
 64 Figure S9. The signal intensities (panels a, b, and c, and panels g, h, and i) and fractions (panels  
 65 d, e, and f, and panels j, k, and l) of protonated ion ( $\text{MH}^+$ ), adduct ions ( $[\text{MH} + \text{H}_2\text{O}]^+$ ),  
 66 and fragmented ions ( $[\text{MH} - \text{H}_2\text{O}]^+$  and  $[\text{MH} - \text{C}_x\text{H}_y]^+$ ) for acetone as functions of E/N  
 67 ratio (a, d, g, and j), RF amplitude (b, e, h, and k), and BSQ amplitude (c, f, i, and l). The  
 68 difference between a/d and g/j is that the former fixed N ( $p = 2.0$  mbar) and varied axial  
 69 voltage (V) to change E/N ratio, while the latter fixed V (= 466 volts) and varied p (i.e.,  
 70 N) to change E/N ratio. The difference between b/e and h/k and between c/f and i/l is that  
 71 the former was at  $p = 2.0$  mbar while the latter  $p = 3.5$  mbar. If not varied, RF amplitude

|     |                                                                                                              |    |
|-----|--------------------------------------------------------------------------------------------------------------|----|
| 72  | was set at 500 volts and BSQ amplitude at 300 volts. ....                                                    | 16 |
| 73  | Figure S10. The signal intensities (panels a, b, and c, and panels g, h, and i) and fractions                |    |
| 74  | (panels d, e, and f, and panels j, k, and l) of protonated ion ( $MH^+$ ), adduct ions ( $[MH +$             |    |
| 75  | $H_2O]^+$ ), and fragmented ions ( $[MH - H_2O]^+$ and $[MH - C_xH_y]^+$ ) for hexaldehyde as                |    |
| 76  | functions of E/N ratio (a, d, g, and j), RF amplitude (b, e, h, and k), and BSQ amplitude                    |    |
| 77  | (c, f, i, and l). The difference between a/d and g/j is that the former fixed N ( $p = 2.0$ mbar)            |    |
| 78  | and varied axial voltage (V) to change E/N ratio, while the latter fixed V (= 466 volts) and                 |    |
| 79  | varied p (i.e., N) to change E/N ratio. The difference between b/e and h/k and between c/f                   |    |
| 80  | and i/l is that the former was at $p = 2.0$ mbar while the latter $p = 3.5$ mbar. If not varied,             |    |
| 81  | RF amplitude was set at 500 volts and BSQ amplitude at 300 volts. ....                                       | 17 |
| 82  | Figure S11. The ratio of $\alpha$ -pinene signals ( $MH^+$ : 137 Th; $[MH - C_xH_y]^+$ : 81 Th) to all ion   |    |
| 83  | signals. This was used to estimate the E/N ratio. ....                                                       | 18 |
| 84  | Figure S12. The sensitivity of acetone. An intercept above zero indicates a high background                  |    |
| 85  | value. ....                                                                                                  | 18 |
| 86  | Figure S13. The signal intensities of $H_3O^+$ , $H_3OH_2O^+$ , and $H_3O(H_2O)_2^+$ as conditions varied as |    |
| 87  | in Figures 3 in the main text and S14 below. ....                                                            | 19 |
| 88  | Figure S14. The ratio of the logarithm of intensity (panels a, b, and c) and the difference of               |    |
| 89  | fractional signal of the protonated ion ( $MH^+$ ) among all ions (panels d, e, and f), when                 |    |
| 90  | changing axial voltage (V) or FIMR pressure (p) (panels a and d), RF amplitude (panels                       |    |
| 91  | b and e), and BSQ amplitude (panels c and f). The ratios were taken after taking the                         |    |
| 92  | logarithm of the signal intensities of $MH^+$ at the right-hand side of the instrument setting               |    |
| 93  | (after the arrow) to that at the left-hand side of the instrument setting stated in the panel                |    |
| 94  | label; likewise, the fractional differences are the fractions of the $MH^+$ signal among the                 |    |
| 95  | protonated, fragmented, and adduct signals under these two instrumental settings. ....                       | 20 |
| 96  | Figure S15. The dependence of the $[MH+H_2O]^+$ signals on RH for the VOCs studied. Panels                   |    |
| 97  | a-f: the relative sensitivity was calculated as the slope (sensitivity) under high-RH                        |    |
| 98  | conditions to that at the dry ( $RH < 5\%$ ) condition. Panel g: the percent change of relative              |    |
| 99  | sensitivity per 10% RH increase. ....                                                                        | 21 |
| 100 | Figure S16. The dependence of the $[MH-H_2O]^+$ signals on RH for the VOCs and OVOCs.                        |    |
| 101 | Panels a-d: the relative sensitivity was calculated as the slope (sensitivity) under high-RH                 |    |
| 102 | conditions to that at the dry ( $RH < 5\%$ ) condition. Panel e: the percent change of relative              |    |
| 103 | sensitivity per 10% RH increase. ....                                                                        | 22 |
| 104 | Figure S17. The dependence of the $[MH-C_xH_y]^+$ signals on RH for the VOCs and OVOCs                       |    |
| 105 | tested at a concentration of $\sim 12$ ppbv. Panels a-e: the relative sensitivity was calculated as          |    |
| 106 | the slope (sensitivity) under high-RH conditions to that at the dry ( $RH < 5\%$ ) condition.                |    |
| 107 | Panel f: the percent change of relative sensitivity per 10% RH increase. ....                                | 23 |
| 108 |                                                                                                              |    |
| 109 |                                                                                                              |    |

110 **Tables.**

111 **Table S1.** The details of instrument setting experiments.

| Varying setting | Vocus front (volt) | Vocus back (volt) | pressure (mbar) | E/N (Td)  | BSQ (volt) | RF (volt) |
|-----------------|--------------------|-------------------|-----------------|-----------|------------|-----------|
| E               | 300 to 700         | 34                | 2               | 48 to 142 | 260        | 500       |
| N               | 500                | 34                | 1.5 to 3.5      | 57 to 133 | 260        | 500       |
| RF              | 700                | 34                | 2               | 171       | 260        | 500 to 13 |
| BSQ             | 700                | 34                | 2               | 171       | 300 to 50  | 500       |
| RF              | 700                | 34                | 3.5             | 98        | 260        | 500 to 13 |
| BSQ             | 700                | 34                | 3.5             | 98        | 300 to 50  | 500       |

112

113 **Table S2.** Details of the tested volatile organic compounds (VOCs). Also shown are their  
 114 proton affinity (PA) values.

| Group <sup>a</sup> | Name                   | CAS#     | m/Q (Th) <sup>b</sup> |          | PA<br>(kJ mol <sup>-1</sup> ) <sup>c</sup> |
|--------------------|------------------------|----------|-----------------------|----------|--------------------------------------------|
|                    |                        |          | Exact                 | Measured |                                            |
| A1                 | Benzene                | 71-43-2  | 79.0542               | 79.0548  | 750.4                                      |
|                    | Toluene                | 108-88-3 | 93.0699               | 93.0699  | 784                                        |
|                    | m-Xylene               | 108-38-3 | 107.0855              | 107.0859 | 812.1                                      |
|                    | 1,2,4-Trimethylbenzene | 95-63-6  | 121.1012              | 121.1007 | 798.3                                      |
| A2                 | Isoprene               | 78-79-5  | 69.0699               | 69.0709  | 826.4                                      |
|                    | $\alpha$ -Pinene       | 80-56-8  | 137.1325              | 137.1321 | 878.6 <sup>d</sup>                         |
|                    | $\beta$ -Caryophyllene | 87-44-5  | 205.1951              | 205.198  | 859.2 <sup>e</sup>                         |
| B1                 | Formaldehyde           | 50-00-0  | 31.0178               | 31.0171  | 712.5                                      |
|                    | Acetaldehyde           | 75-07-0  | 45.0335               | 45.0329  | 768.5                                      |
| B2                 | n-Butanal              | 123-72-8 | 73.0648               | 73.0656  | 792.7                                      |
|                    | Pentanal               | 110-62-3 | 87.0804               | 87.0802  | 796.6                                      |
|                    | Hexaldehyde            | 66-25-1  | 101.0961              | 101.0957 | 794.4~797 <sup>f</sup>                     |
| B3                 | Acetone                | 67-64-1  | 59.0491               | 59.0491  | 812                                        |
|                    | Methyl ethyl Ketone    | 78-93-3  | 73.0648               | 73.0656  | 827.3                                      |
| B4                 | Acrolein               | 107-02-8 | 57.0335               | 57.0332  | 797                                        |
|                    | Methacrolein           | 78-85-3  | 71.0491               | 71.0495  | 808.7                                      |
| B5                 | Benzaldehyde           | 100-52-1 | 107.0491              | 107.0504 | 834                                        |
|                    | m-Tolualdehyde         | 620-23-5 | 121.0648              | 121.0651 | 840                                        |
| C1                 | Acetonitrile           | 75-05-8  | 42.0338               | 42.0329  | 779.2                                      |
|                    | Acrylonitrile          | 107-13-1 | 54.0338               | 54.0334  | 784.7                                      |
| C2                 | Methanol               | 67-56-1  | 33.0335               | 33.0323  | 754.3                                      |

115 Notes:  
 116 a, A1: aromatic hydrocarbons, A2: terpenoids, B1: small aldehydes; B2: long-chain aldehydes, B3: ketones, B4:  
 117 unsaturated aldehydes, B5: aromatic aldehydes, C1: nitriles, C2: methanol;  
 118 b, mass-to-charge ratio of protonated ion MH<sup>+</sup>;  
 119 c, taken from NIST Chemistry WebBook William E. Acree and Chickos (2023), unless stated otherwise;  
 120 d, from Solouki and Szulejko (2007); e, from Jenkin et al. (2012); f, from Blake et al. (2008).  
 121

122 **Table S3.** Proton-transfer reaction rate constants ( $k_{\text{ptr}}, \times 10^{-9} \text{ cm}^3 \text{ molec}^{-1} \text{ s}^{-1}$ ) from literature.

| Group | Name                   | $k_{\text{model}}^{\text{a}}$ |      | $k_{\text{experiment}}^{\text{b}}$ |     |      | $N^{\text{c}}$ | $k_{\text{avg}}^{\text{d}}$ | $k_{\text{std}}^{\text{e}}$ |      |
|-------|------------------------|-------------------------------|------|------------------------------------|-----|------|----------------|-----------------------------|-----------------------------|------|
| A1    | Benzene                | 1.97                          | 1.8  | 1.9                                | 2.1 | 1.85 | —              | 5                           | 1.92                        | 0.13 |
|       | Toluene                | 2.12                          | 2.05 | 1.9                                | 2.2 | 2.3  | —              | 5                           | 2.11                        | 0.14 |
|       | m-Xylene               | 2.26                          | 2.3  | —                                  | —   | —    | —              | 2                           | 2.28                        | 0.24 |
|       | 1,2,4-Trimethylbenzene | 2.4                           | 2.4  | —                                  | —   | —    | —              | 2                           | 2.4                         | 0.25 |
| A2    | Isoprene               | 1.94                          | 1.3  | 2                                  | 2   | 1.7  | 2.1            | 6                           | 1.84                        | 0.12 |
|       | $\alpha$ -Pinene       | 2.44                          | 2.2  | 2.6                                | —   | —    | —              | 3                           | 2.41                        | 0.22 |
|       | $\beta$ -Caryophyllene | 3.1                           | —    | —                                  | —   | —    | —              | 1                           | 3.1                         | 0.47 |
| B1    | Formaldehyde           | 3                             | 3.4  | —                                  | —   | —    | —              | 2                           | 3.2                         | 0.35 |
|       | Acetaldehyde           | 3.36                          | 3.5  | 3.6                                | 3.7 | —    | —              | 4                           | 3.54                        | 0.27 |
| B2    | n-Butanal              | 3.49                          | 3.8  | —                                  | —   | —    | —              | 2                           | 3.65                        | 0.39 |
|       | Pentanal               | 3.34                          | 3.6  | —                                  | —   | —    | —              | 2                           | 3.47                        | 0.37 |
|       | Hexaldehyde            | 3.74                          | 3.7  | —                                  | —   | —    | —              | 2                           | 3.72                        | 0.39 |
| B3    | Acetone                | 3                             | 2.4  | 3.59                               | 3.9 | 4.1  | —              | 5                           | 3.4                         | 0.26 |
|       | Methyl ethyl Ketone    | 3.83                          | 3.03 | 3.9                                | —   | —    | —              | 3                           | 3.59                        | 0.34 |
| B4    | Acrolein               | 3.35                          | 4.2  | —                                  | —   | —    | —              | 2                           | 3.78                        | 0.45 |
|       | Methacrolein           | 3.55                          | —    | —                                  | —   | —    | —              | 1                           | 3.55                        | 0.53 |
| B5    | Benzaldehyde           | 4.12                          | 3.7  | —                                  | —   | —    | —              | 2                           | 3.91                        | 0.43 |
|       | m-Tolualdehyde         | 4.9                           | 4.1  | —                                  | —   | —    | —              | 2                           | 4.5                         | 0.52 |
| C1    | Acetonitrile           | 4.74                          | 2.7  | 4.7                                | 5.1 | 3.92 | —              | 5                           | 4.23                        | 0.33 |
|       | Acrylonitrile          | 5.1                           | —    | —                                  | —   | —    | —              | 1                           | 5.1                         | 0.77 |
| C2    | Methanol               | 2.33                          | 2.1  | 2.2                                | 2.7 | —    | —              | 4                           | 2.33                        | 0.18 |

123 Notes:  
 124 a, From Zhao and Zhang (2004);  
 125 b, From Pagonis et al. (2019) and reference therein, as well as Zhao and Zhang (2004), Michel et al. (2005),  
 126 Milligan et al. (2002), Lindinger et al. (1998), Cappellin et al. (2012), Sekimoto et al. (2017);  
 127 c, number of values for averaging;  
 128 d, averaged  $k_{\text{proton-transfer}}$ ;  
 129 e, the uncertainty of  $k_{\text{proton-transfer}}$  by assuming 15% uncertainty for modeled values Zhao and Zhang (2004) as well  
 130 as experiment values, weighted by the number of values.  
 131

132 **Table S4.** The RH dependence, sensitivity, intercept of protonated adducts, and fragmented ions.

| Group | Name                         | [MH+H <sub>2</sub> O] <sup>+</sup> |                 |                   | [MH-H <sub>2</sub> O] <sup>+</sup> |                 |                   | [MH-C <sub>x</sub> H <sub>y</sub> ] <sup>+</sup> |                 |                   | Signal percentage (%) <sup>b</sup> |                                    |                                    |                                                  |
|-------|------------------------------|------------------------------------|-----------------|-------------------|------------------------------------|-----------------|-------------------|--------------------------------------------------|-----------------|-------------------|------------------------------------|------------------------------------|------------------------------------|--------------------------------------------------|
|       |                              | Sensitivity (cps/ppbv)             | Intercept (cps) | RH-dependence (%) | Sensitivity (cps/ppbv)             | Intercept (cps) | RH-dependence (%) | Sensitivity (cps/ppbv)                           | Intercept (cps) | RH-dependence (%) | MH <sup>+</sup>                    | [MH+H <sub>2</sub> O] <sup>+</sup> | [MH-H <sub>2</sub> O] <sup>+</sup> | [MH-C <sub>x</sub> H <sub>y</sub> ] <sup>+</sup> |
| A1    | Benzene                      | — <sup>a</sup>                     | —               | —                 | —                                  | —               | —                 | —                                                | —               | —                 | 100                                | —                                  | —                                  | —                                                |
|       | Toluene                      | —                                  | —               | —                 | —                                  | —               | —                 | 153.7                                            | 52.7            | -1.5              | 98                                 | —                                  | —                                  | 2                                                |
|       | m-Xylene                     | —                                  | —               | —                 | —                                  | —               | —                 | 2903.7                                           | -168.1          | -0.8              | 76                                 | —                                  | —                                  | 24                                               |
|       | 1,2,4-Trimethylbenzene       | —                                  | —               | —                 | —                                  | —               | —                 | 1219.8                                           | -185.5          | -0.4              | 88                                 | —                                  | —                                  | 12                                               |
| A2    | Isoprene                     | —                                  | —               | —                 | —                                  | —               | —                 | 154.4                                            | 211.9           | -1.1              | 93                                 | —                                  | —                                  | 7                                                |
|       | α-Pinene                     | —                                  | —               | —                 | —                                  | —               | —                 | 4171.2                                           | 1437.7          | 0.2               | 46                                 | —                                  | —                                  | 54                                               |
|       | β-Caryophyllene              | 1.4                                | 1.7             | 3.5               | —                                  | —               | —                 | —                                                | —               | —                 | 100                                | —                                  | —                                  | <<1 <sup>d</sup>                                 |
| B1    | Formaldehyde                 | —                                  | —               | —                 | —                                  | —               | —                 | —                                                | —               | —                 | 100                                | —                                  | —                                  | —                                                |
|       | Acetaldehyde I <sup>c</sup>  | —                                  | —               | —                 | 0.1                                | 0.6             | -0.79             | —                                                | —               | —                 | 100                                | —                                  | <<1 <sup>d</sup>                   | —                                                |
|       | Acetaldehyde II <sup>c</sup> | —                                  | —               | —                 | 0.2                                | 0.6             | 0.67              | —                                                | —               | —                 | 100                                | —                                  | <<1 <sup>d</sup>                   | —                                                |
| B2    | n-Butanal                    | 201.4                              | 327.5           | 5.1               | 5589.1                             | 13531           | 0.02              | —                                                | —               | —                 | 23                                 | 3                                  | 75                                 | ? <sup>e</sup>                                   |
|       | Pentanal                     | 1300.1                             | 1617.1          | 1.4               | 4116.6                             | 816.3           | 0.29              | —                                                | —               | —                 | 24                                 | 7                                  | 69                                 | ?                                                |
|       | Hexaldehyde                  | 367                                | 399.3           | 8.2               | 367                                | 399.3           | 0.30              | 84                                               | 1203.6          | 0.6               | 20                                 | 6                                  | 72                                 | 2                                                |
| B3    | Acetone I <sup>c</sup>       | 58                                 | 433             | 5.4               | 288.1                              | 635             | 0.37              | 131                                              | 5939.7          | -3.0              | 91                                 | 1                                  | 3                                  | 5                                                |
|       | Acetone II <sup>c</sup>      | 64.5                               | 444.3           | 5.3               | 603.5                              | 556.6           | 0.38              | 170.9                                            | 5674.8          | -2.1              | 91                                 | 1                                  | 3                                  | 5                                                |
|       | Methyl ethyl Ketone          | 273.4                              | 178.3           | 2.8               | 1084.3                             | 13728.2         | -0.92             | 208.2                                            | 2614.9          | 0.2               | 77                                 | 2                                  | 17                                 | 2                                                |
| B4    | Acrolein                     | 49.7                               | 4057            | 2.3               | 268.7                              | 339.2           | 0.47              | —                                                | —               | —                 | 91                                 | 5                                  | 4                                  | —                                                |
|       | Methacrolein                 | 385.5                              | 746.5           | 2.3               | 217.5                              | 176.6           | -0.19             | —                                                | —               | —                 | 90                                 | 7                                  | 3                                  | —                                                |
| B5    | Benzaldehyde                 | 774.9                              | -457.7          | 2.7               | —                                  | —               | —                 | —                                                | —               | —                 | 95                                 | 5                                  | —                                  | —                                                |
|       | m-Tolualdehyde               | 985                                | -956.1          | 2.4               | —                                  | —               | —                 | 1261                                             | 742.5           | -2.4              | 87                                 | 8                                  | —                                  | 6                                                |
| C1    | Acetonitrile                 | 46.2                               | 1199.8          | 8.5               | —                                  | —               | —                 | —                                                | —               | —                 | 93                                 | 7                                  | —                                  | —                                                |
|       | Acrylonitrile                | 118.2                              | 111             | 5.2               | —                                  | —               | —                 | —                                                | —               | —                 | 99                                 | 1                                  | —                                  | —                                                |
| C2    | Methanol                     | 40.7                               | 0.69            | 1.9               | —                                  | —               | —                 | —                                                | —               | —                 | 3                                  | 97                                 | —                                  | —                                                |

133 Notes:

134 a, not available;

135 b, the specific percentage of fragment or adducted ion signals on all ion signals;

136 c, from gas standard cylinders I and II.

137 d, far less than 1 and closer to zero;

138 e, not determined due to overlapping signals.

139 **Figures.**

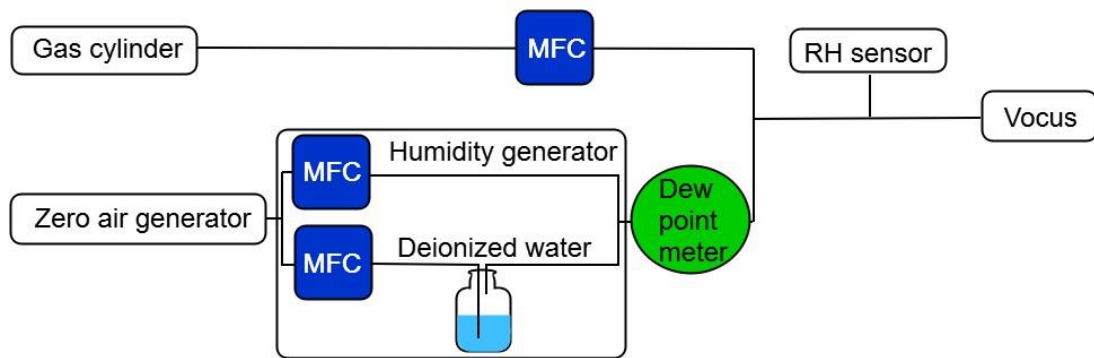

140

141 **Figure S1.** The diagram of the RH experimental setup. MFC: mass flow controller.  
142



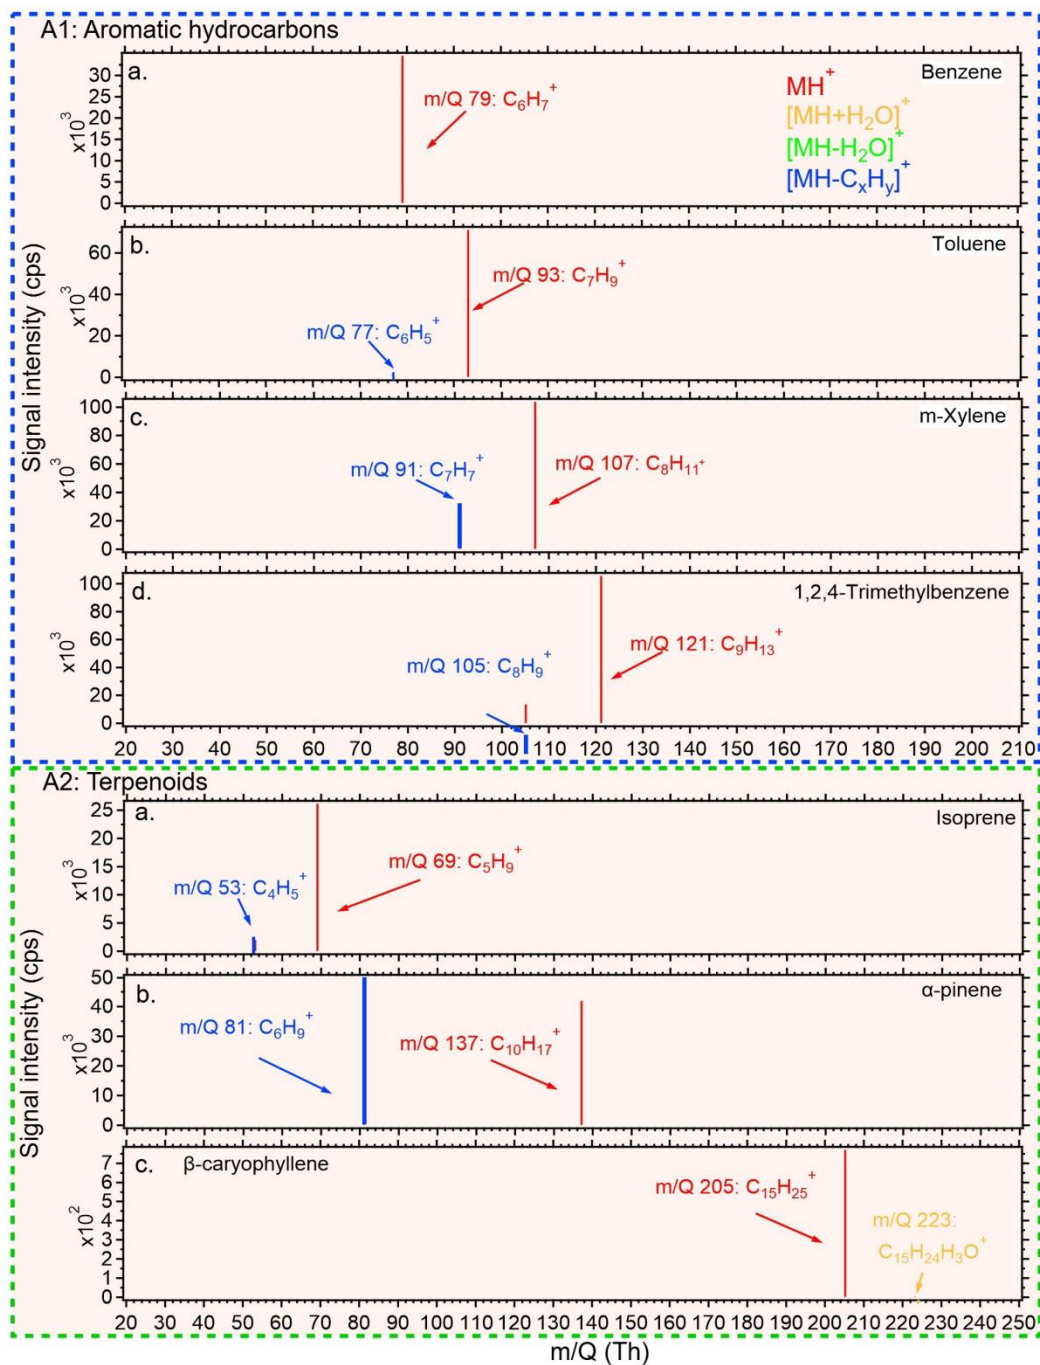

143

144 **Figure S2.** The mass spectra of aromatic hydrocarbons (benzene, toluene, m-xylene,  
 145 and 1,2,4-trimethylbenene), and terpenoids (isoprene,  $\alpha$ -pinene, and  $\beta$ -caryophyllene)  
 146 in Vocus at a mixing ratio of  $\sim 12$  ppbv ( $\beta$ -caryophyllene 1.2 ppbv).  
 147

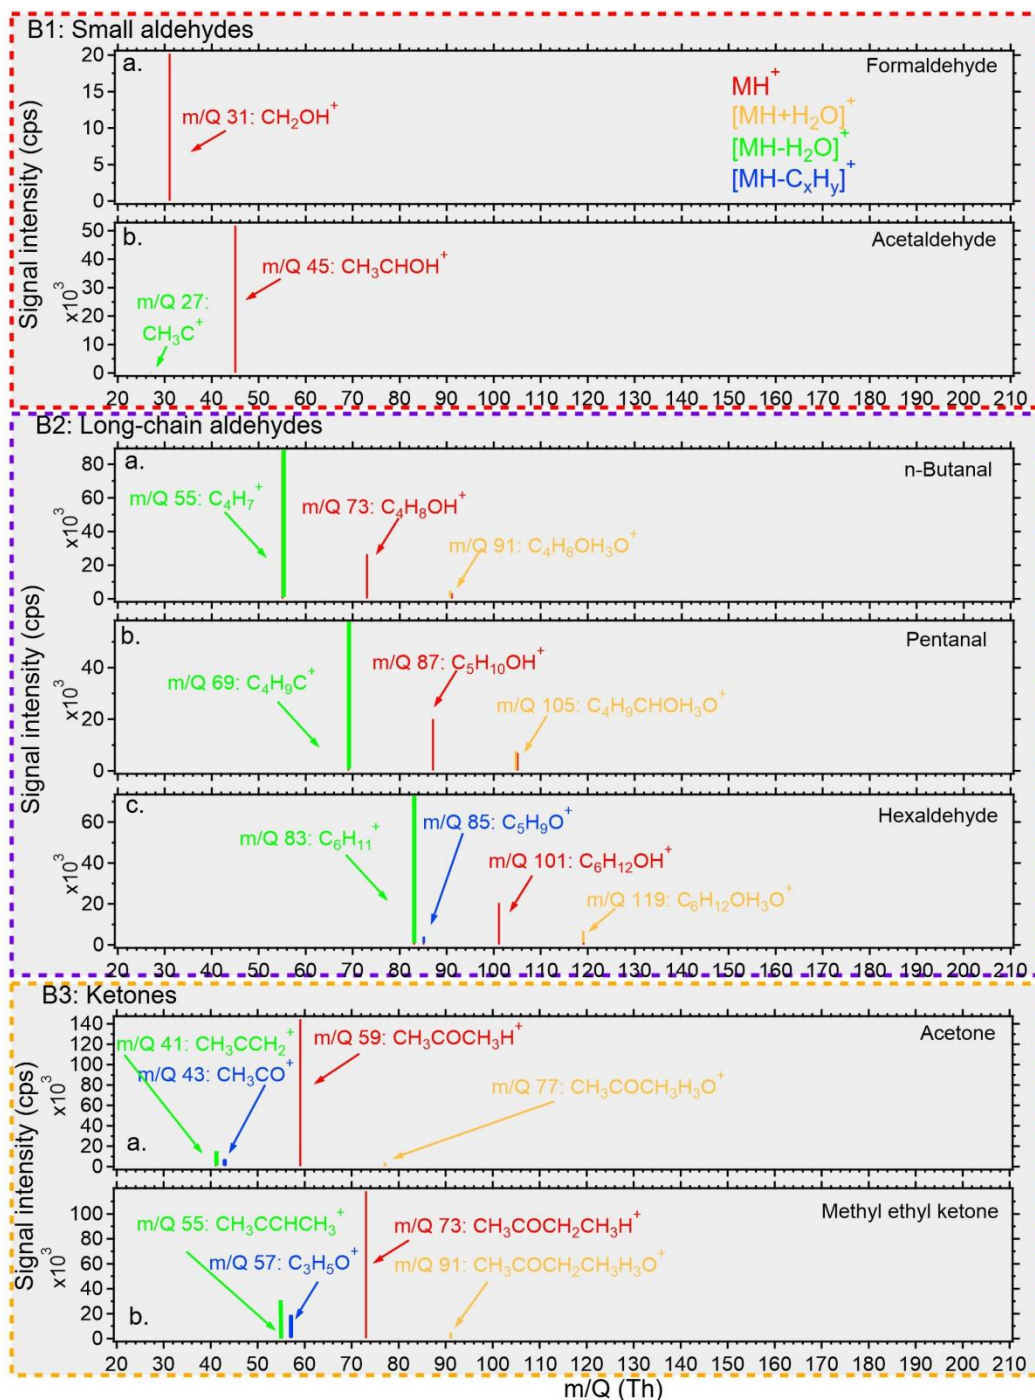

148

149 **Figure S3.** The mass spectra of small aldehydes (formaldehyde and acetaldehyde),

150 long-chain aldehydes (n-butanal, pentanal, and hexaldehyde), and ketones (acetone,

151 and methyl ethyl ketone) in Vocus at a mixing ratio of  $\sim 12$  ppbv.

152

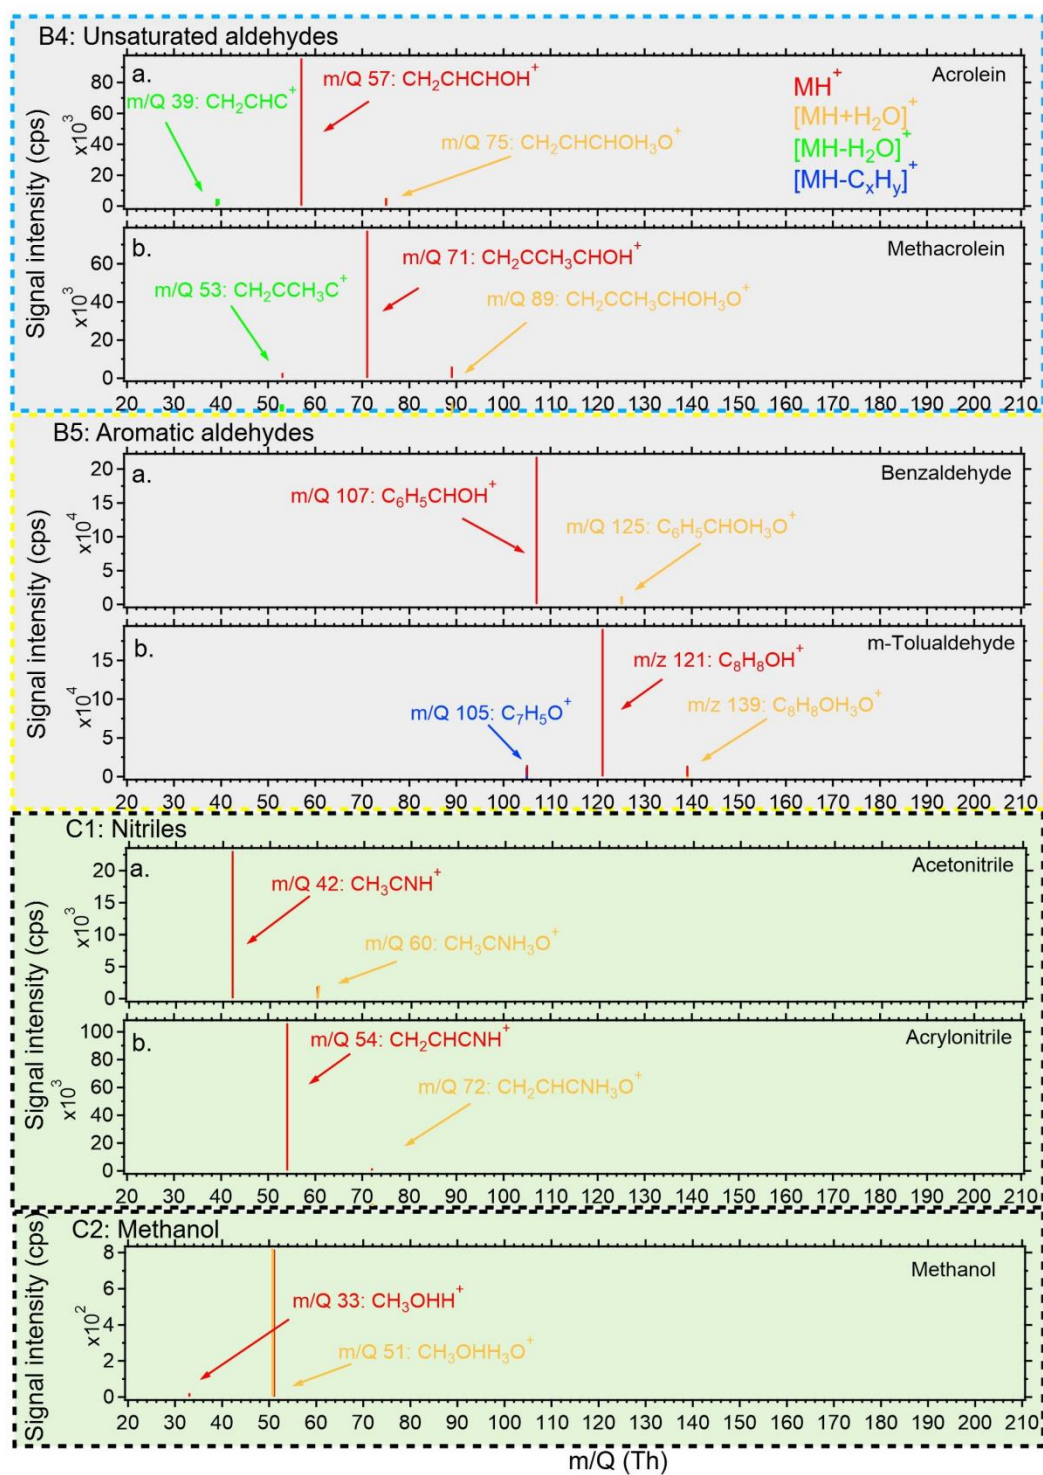

153

154 **Figure S4.** The mass spectra of unsaturated aldehydes (acrolein and methacrolein),

155 aromatic aldehydes (benzaldehyde and m-tolualdehyde), nitriles (acetonitrile and

156 acrylonitrile), and methanol in Vocus at a mixing ratio of  $\sim 12$  ppbv.

157

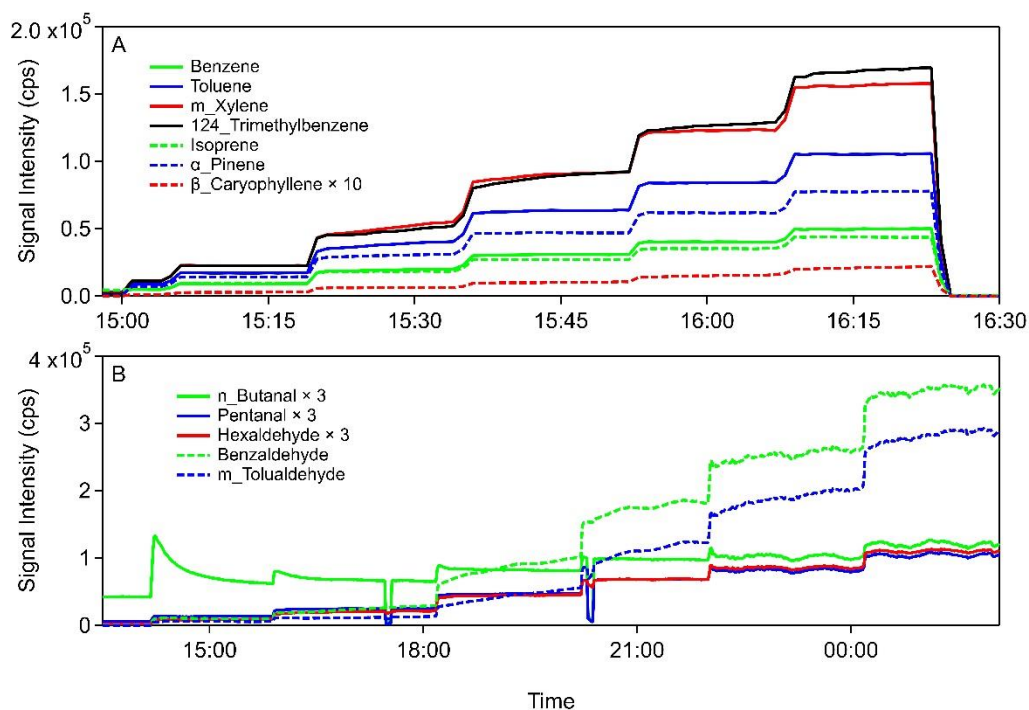

158  
 159 **Figure S5.** Time series of the protonated ion ( $MH^+$ ) signals for selected (A) VOCs and  
 160 (B) OVOCs as concentration varied from 0 to  $\sim 22$  ppbv ( $\sim 2$  ppbv for  $\beta$  caryophyllene)  
 161 under dry ( $MH \sim 5\%$ ) conditions. Note the signals were magnified by 10 times for  $\beta$ -  
 162 caryophyllene and 3 times for n-butanal, pentanal, and hexaldehyde.  
 163



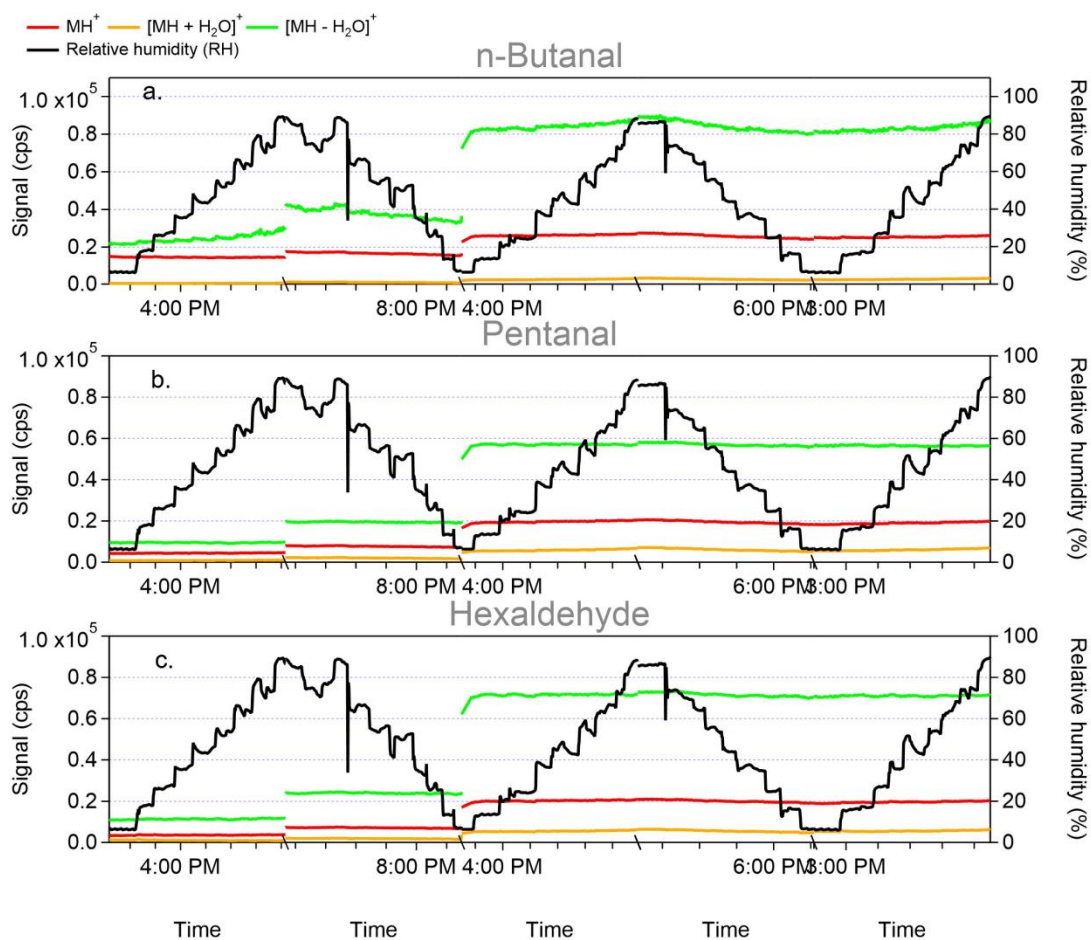

164

165

166 **Figure S6.** Time series of the protonated ion ( $MH^+$ ), adduct ions ( $[MH + H_2O]^+$ ), and  
 167 fragmented ions ( $[MH - H_2O]^+$ ) and/or ( $[MH - C_xH_y]^+$ ) signals for n-butanal, pentanal,  
 168 and hexaldehyde. Note that the time in x axis is not continuous, with some periods with  
 169 noisy signals cut off.

169

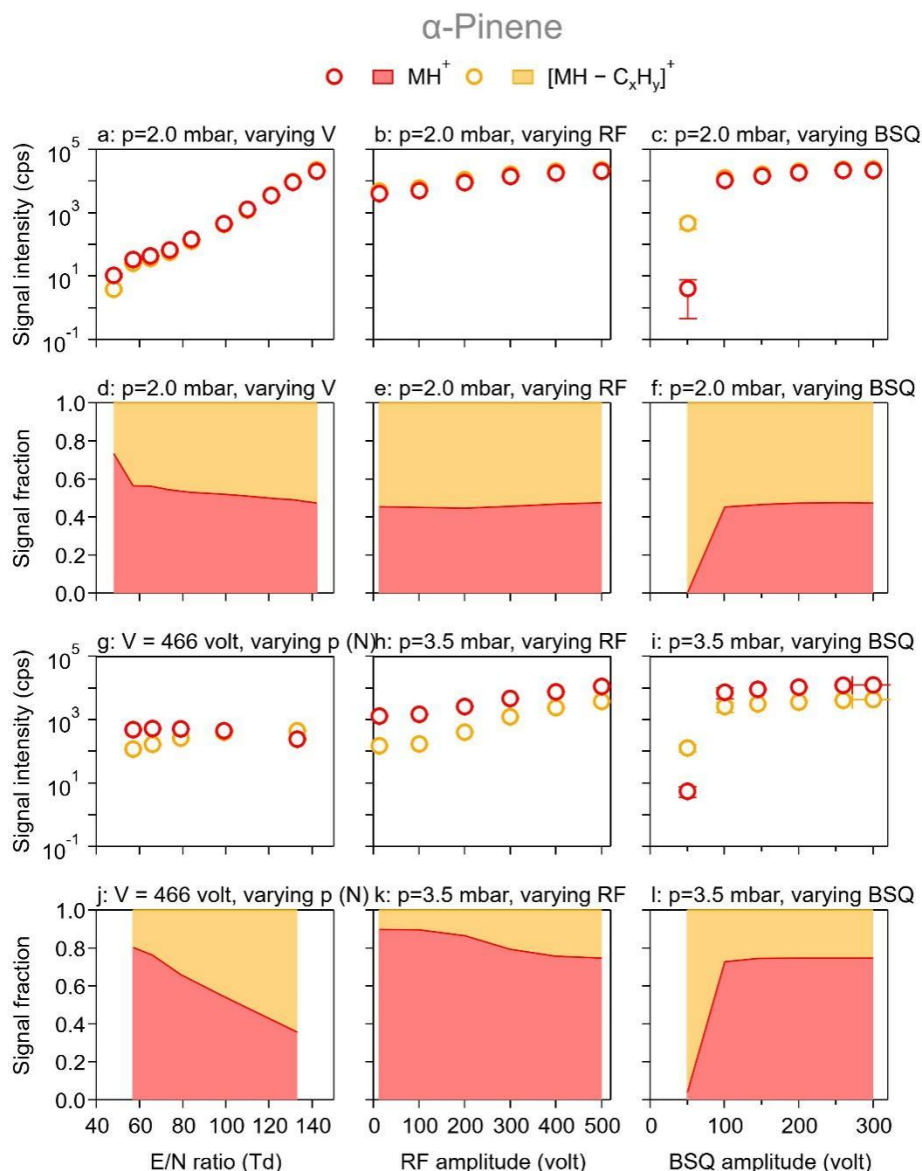

170  
 171 **Figure S7.** The signal intensities (panels a, b, and c, and panels g, h, and i) and fractions  
 172 (panels d, e, and f, and panels j, k, and l) of protonated ion ( $\text{MH}^+$ ), adduct ions ( $[\text{MH} +$   
 173  $\text{H}_2\text{O}]^+$ ), and fragmented ions ( $[\text{MH} - \text{H}_2\text{O}]^+$  and  $[\text{MH} - \text{C}_x\text{H}_y]^+$ ) for  $\alpha$ -pinene as  
 174 functions of E/N ratio (a, d, g, and j), RF amplitude (b, e, h, and k), and BSQ amplitude  
 175 (c, f, i, and l). The difference between a/d and g/j is that the former fixed N ( $p = 2.0$   
 176 mbar) and varied axial voltage (V) to change E/N ratio, while the latter fixed V (= 466  
 177 volts) and varied  $p$  (i.e., N) to change E/N ratio. The difference between b/e and h/k and  
 178 between c/f and i/l is that the former was at  $p = 2.0$  mbar while the latter  $p = 3.5$  mbar.  
 179 If not varied, RF amplitude was set at 500 volts and BSQ amplitude at 300 volts.

180

## 1,2,4-Trimethylbenzene

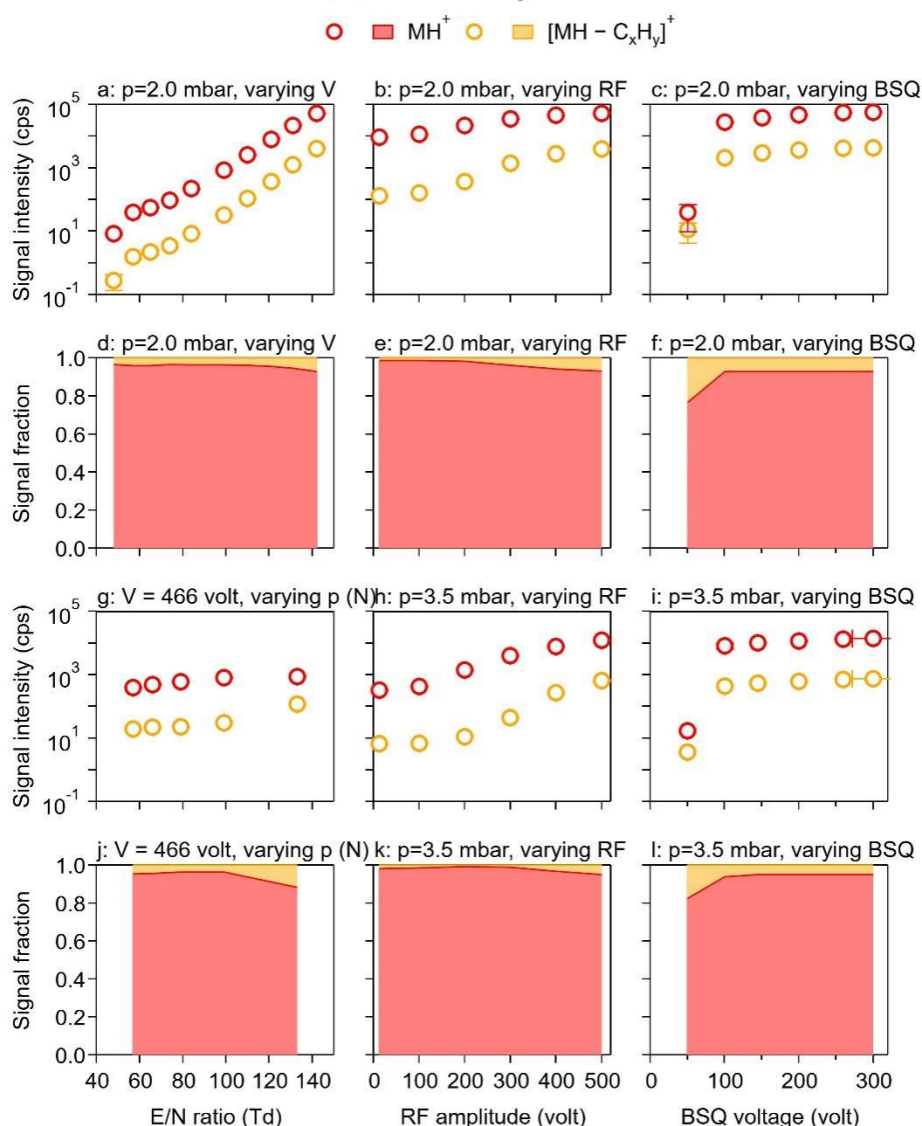

181  
 182 **Figure S8.** The signal intensities (panels a, b, and c, and panels g, h, and i) and fractions  
 183 (panels d, e, and f, and panels j, k, and l) of protonated ion ( $\text{MH}^+$ ), adduct ions ( $[\text{MH} +$   
 184  $\text{H}_2\text{O}]^+$ ), and fragmented ions ( $[\text{MH} - \text{H}_2\text{O}]^+$  and  $[\text{MH} - \text{C}_x\text{H}_y]^+$ ) for 1,2,4-  
 185 trimethylbenzene as functions of E/N ratio (a, d, g, and j), RF amplitude (b, e, h, and k),  
 186 and BSQ amplitude (c, f, i, and l). The difference between a/d and g/j is that the former  
 187 fixed N ( $p = 2.0$  mbar) and varied axial voltage (V) to change E/N ratio, while the latter  
 188 fixed V (= 466 volts) and varied p (i.e., N) to change E/N ratio. The difference between  
 189 b/e and h/k and between c/f and i/l is that the former was at  $p = 2.0$  mbar while the latter  
 190  $p = 3.5$  mbar. If not varied, RF amplitude was set at 500 volts and BSQ amplitude at  
 191 300 volts.

192

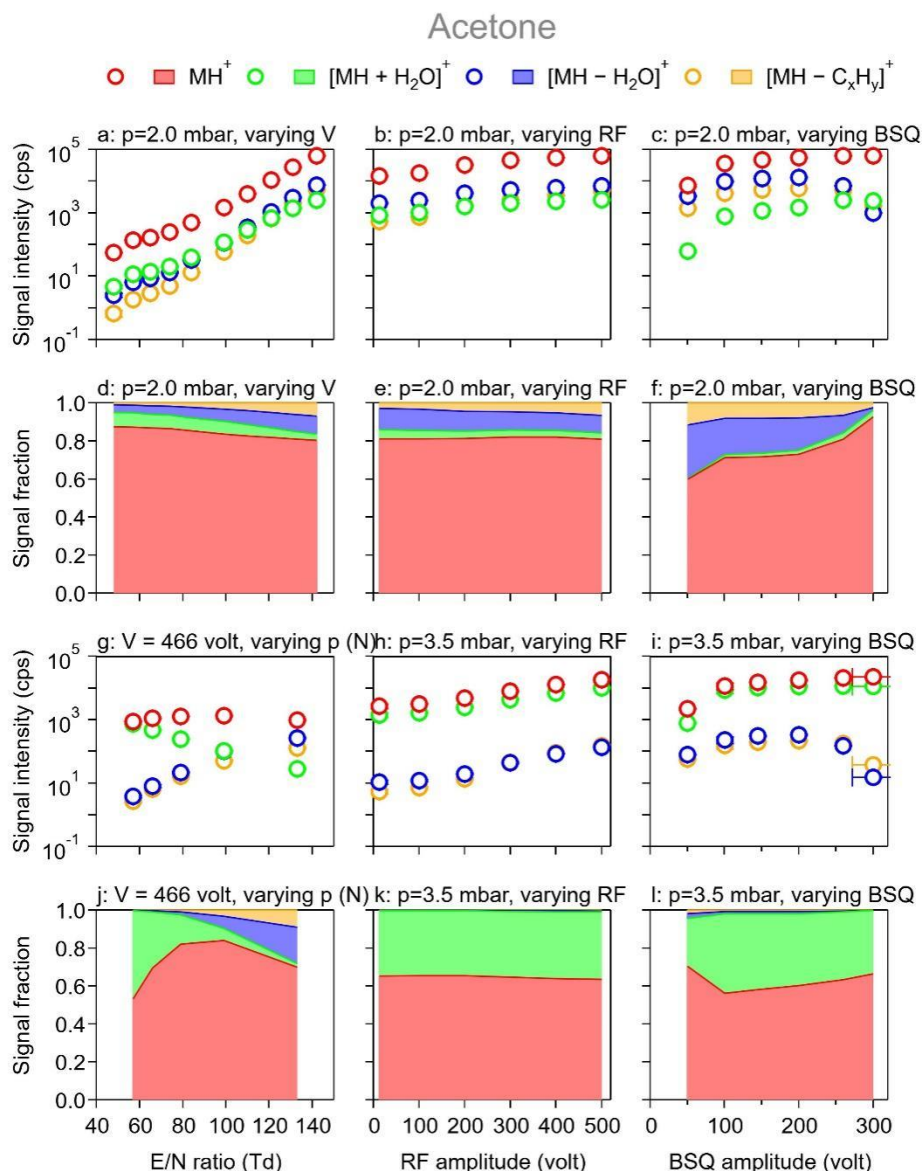

193  
 194 **Figure S9.** The signal intensities (panels a, b, and c, and panels g, h, and i) and fractions  
 195 (panels d, e, and f, and panels j, k, and l) of protonated ion ( $\text{MH}^+$ ), adduct ions ( $[\text{MH} +$   
 196  $\text{H}_2\text{O}]^+$ ), and fragmented ions ( $[\text{MH} - \text{H}_2\text{O}]^+$  and  $[\text{MH} - \text{C}_x\text{H}_y]^+$ ) for acetone as functions  
 197 of E/N ratio (a, d, g, and j), RF amplitude (b, e, h, and k), and BSQ amplitude (c, f, i,  
 198 and l). The difference between a/d and g/j is that the former fixed N ( $p = 2.0$  mbar) and  
 199 varied axial voltage (V) to change E/N ratio, while the latter fixed V (= 466 volts) and  
 200 varied  $p$  (i.e., N) to change E/N ratio. The difference between b/e and h/k and between  
 201 c/f and i/l is that the former was at  $p = 2.0$  mbar while the latter  $p = 3.5$  mbar. If not  
 202 varied, RF amplitude was set at 500 volts and BSQ amplitude at 300 volts.

203



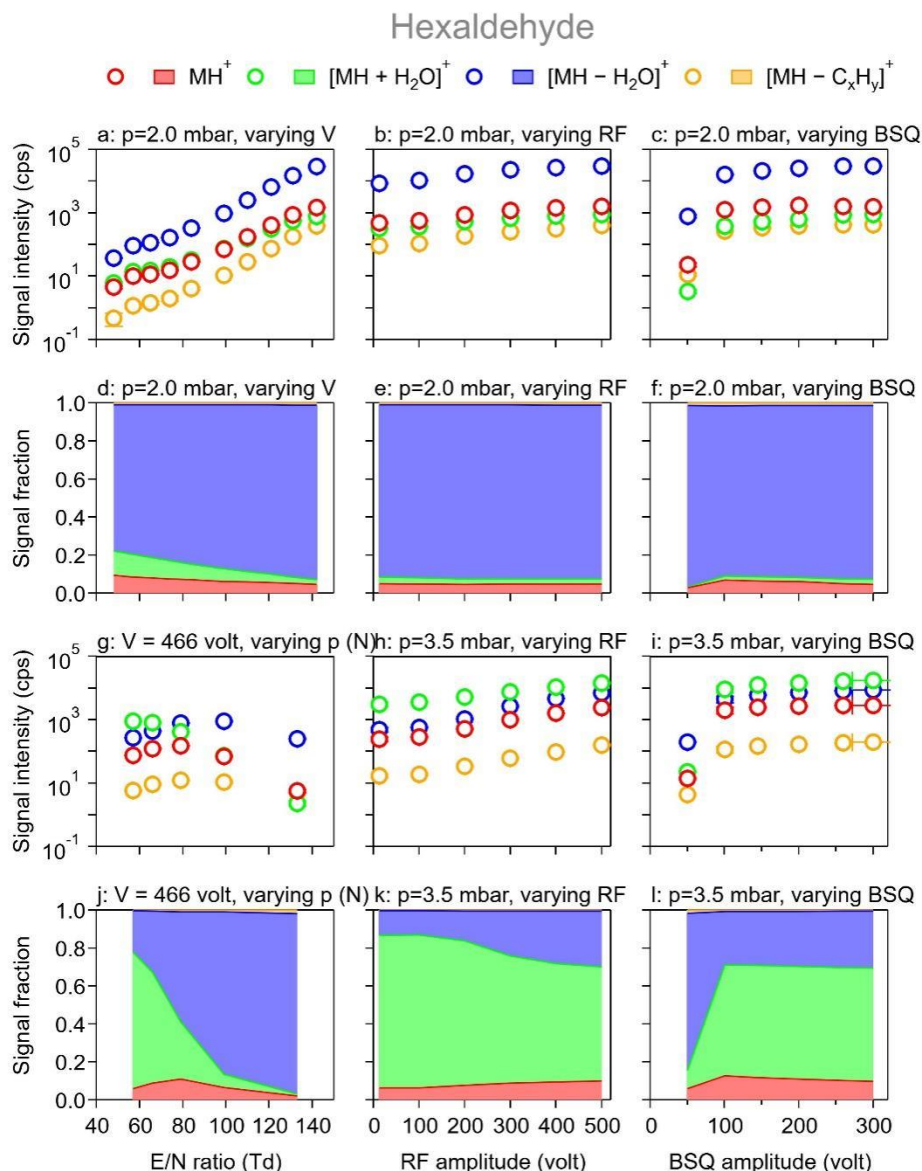

204  
 205 **Figure S10.** The signal intensities (panels a, b, and c, and panels g, h, and i) and  
 206 fractions (panels d, e, and f, and panels j, k, and l) of protonated ion ( $\text{MH}^+$ ), adduct ions  
 207 ( $[\text{MH} + \text{H}_2\text{O}]^+$ ), and fragmented ions ( $[\text{MH} - \text{H}_2\text{O}]^+$  and  $[\text{MH} - \text{C}_x\text{H}_y]^+$ ) for  
 208 hexaldehyde as functions of E/N ratio (a, d, g, and j), RF amplitude (b, e, h, and k), and  
 209 BSQ amplitude (c, f, i, and l). The difference between a/d and g/j is that the former  
 210 fixed N ( $p = 2.0$  mbar) and varied axial voltage (V) to change E/N ratio, while the latter  
 211 fixed V (= 466 volts) and varied p (i.e., N) to change E/N ratio. The difference between  
 212 b/e and h/k and between c/f and i/l is that the former was at  $p = 2.0$  mbar while the latter  
 213  $p = 3.5$  mbar. If not varied, RF amplitude was set at 500 volts and BSQ amplitude at  
 214 300 volts.  
 215

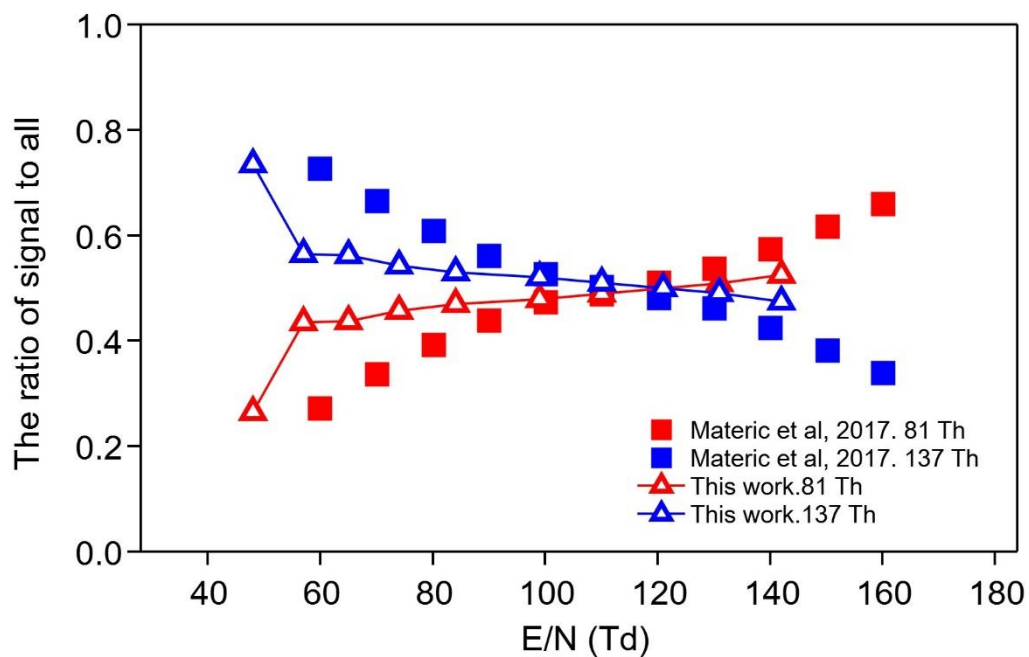

216  
 217 **Figure S11.** The ratio of  $\alpha$ -pinene signals ( $MH^+$ : 137 Th;  $[MH - C_xH_y]^+$ : 81 Th) to all  
 218 ion signals. This was used to estimate the E/N ratio.

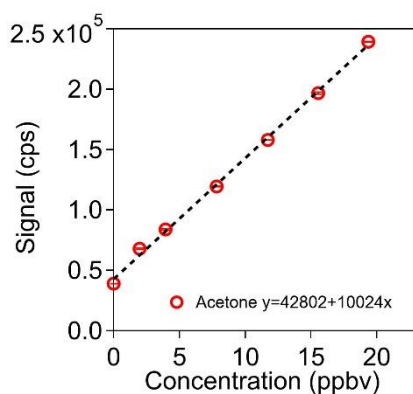

219  
 220 **Figure S12.** The sensitivity of acetone. An intercept above zero indicates a high  
 221 background value.

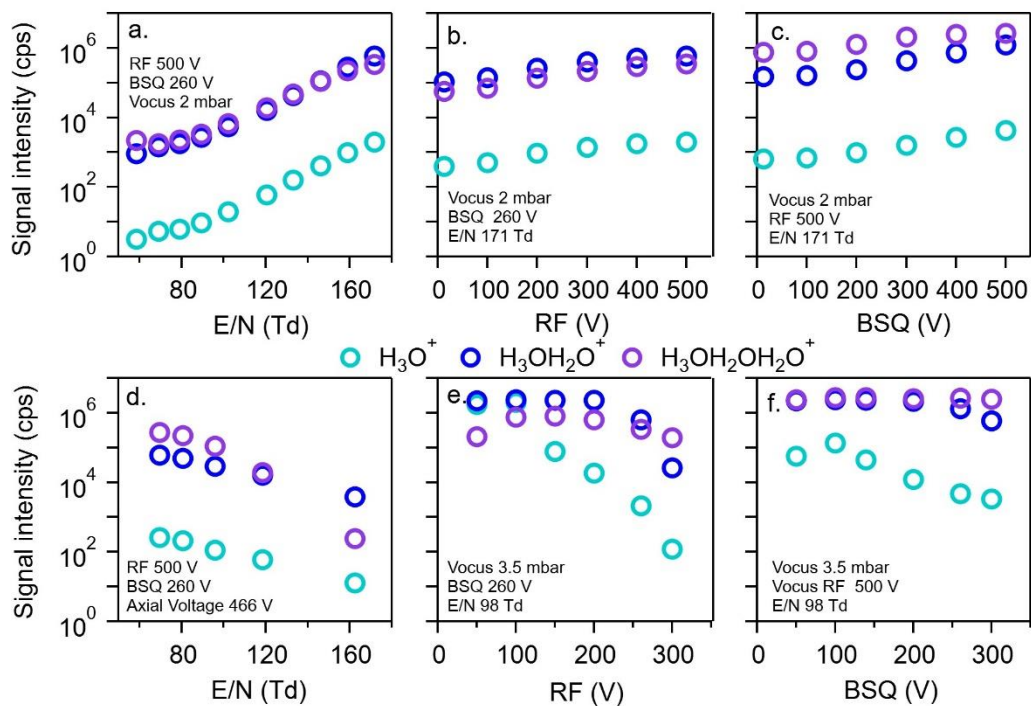

222

223

**Figure S13.** The signal intensities of  $\text{H}_3\text{O}^+$ ,  $\text{H}_3\text{OH}_2\text{O}^+$ , and  $\text{H}_3\text{O}(\text{H}_2\text{O})_2^+$  as conditions

224

varied as in Figures 3 in the main text and S14 below.

225

■ Aromatic hydrocarbons    ■ Terpenoids    ■ Small aldehydes    ■ Long-chain aldehydes  
■ Ketones    ■ Unsaturated aldehydes    ■ Aromatic aldehydes    ■ Nitriles    ■ Methanol

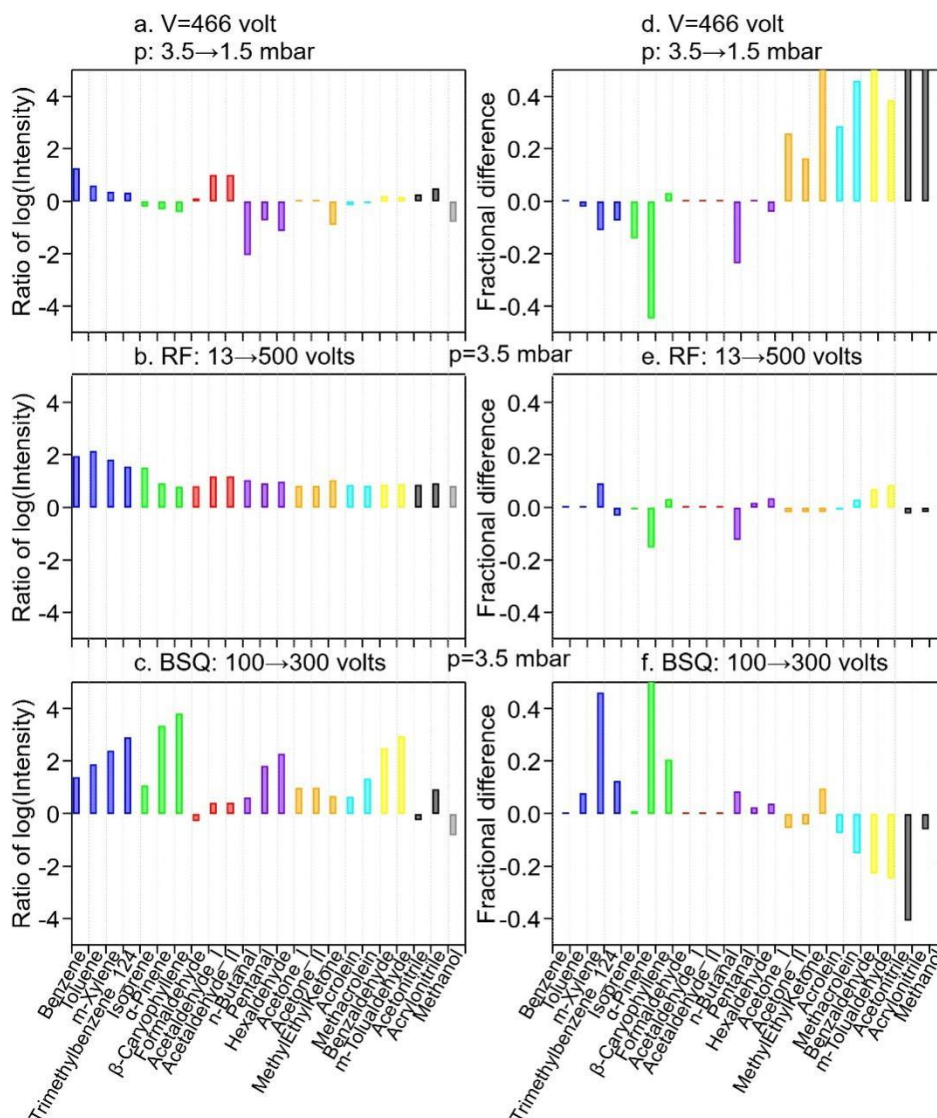

226  
 227 **Figure S14.** The ratio of the logarithm of intensity (panels a, b, and c) and the difference  
 228 of fractional signal of the protonated ion ( $MH^+$ ) among all ions (panels d, e, and f),  
 229 when changing axial voltage (V) or FIMR pressure (p) (panels a and d), RF amplitude  
 230 (panels b and e), and BSQ amplitude (panels c and f). The ratios were taken after taking  
 231 the logarithm of the signal intensities of  $MH^+$  at the right-hand side of the instrument  
 232 setting (after the arrow) to that at the left-hand side of the instrument setting stated in  
 233 the panel label; likewise, the fractional differences are the fractions of the  $MH^+$  signal  
 234 among the protonated, fragmented, and adduct signals under these two instrumental  
 235 settings.  
 236  
 237

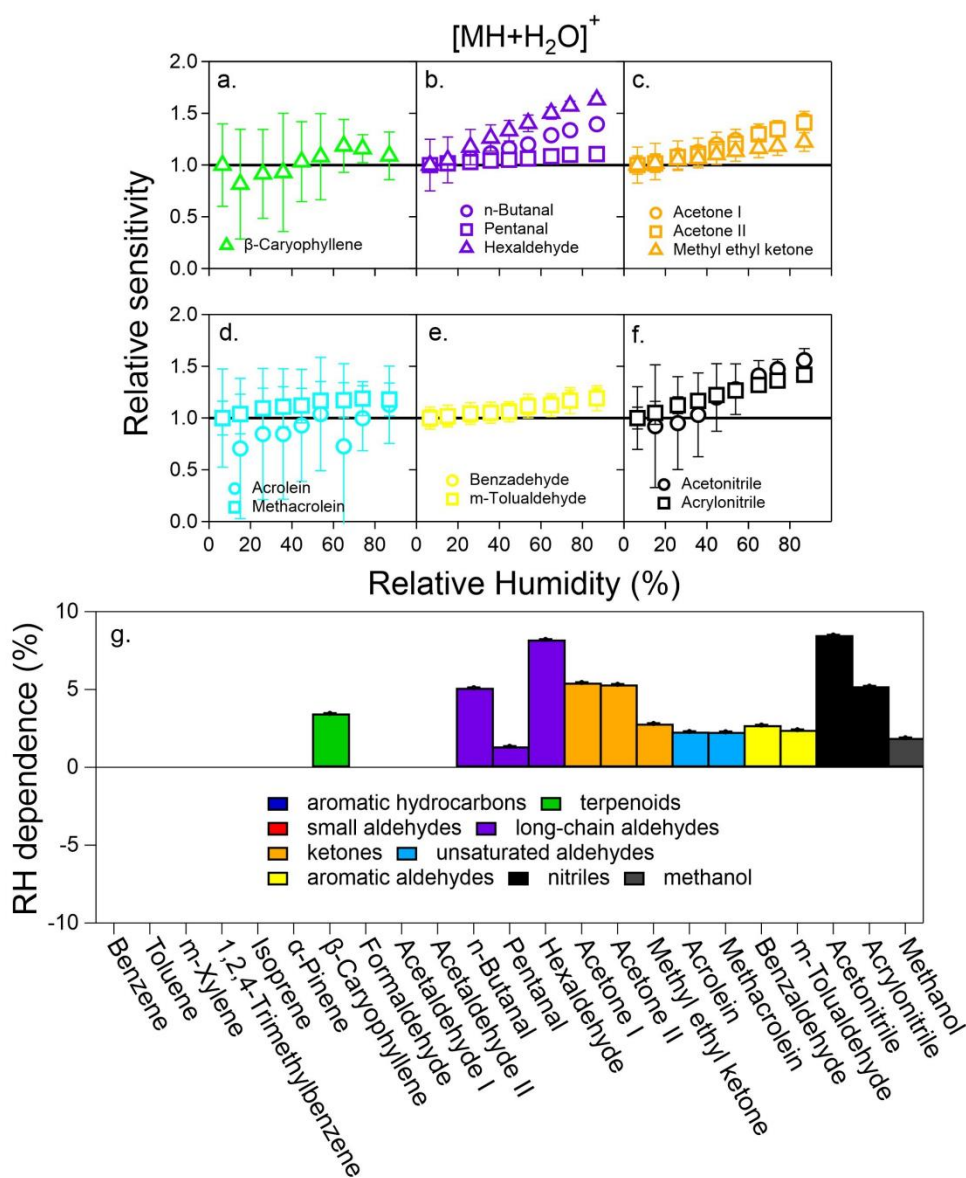

238

239 **Figure S15.** The dependence of the  $[MH+H_2O]^+$  signals on RH for the VOCs studied.

240 Panels a-f: the relative sensitivity was calculated as the slope (sensitivity) under high-

241 RH conditions to that at the dry (RH<5%) condition. Panel g: the percent change of

242 relative sensitivity per 10% RH increase.

243

244

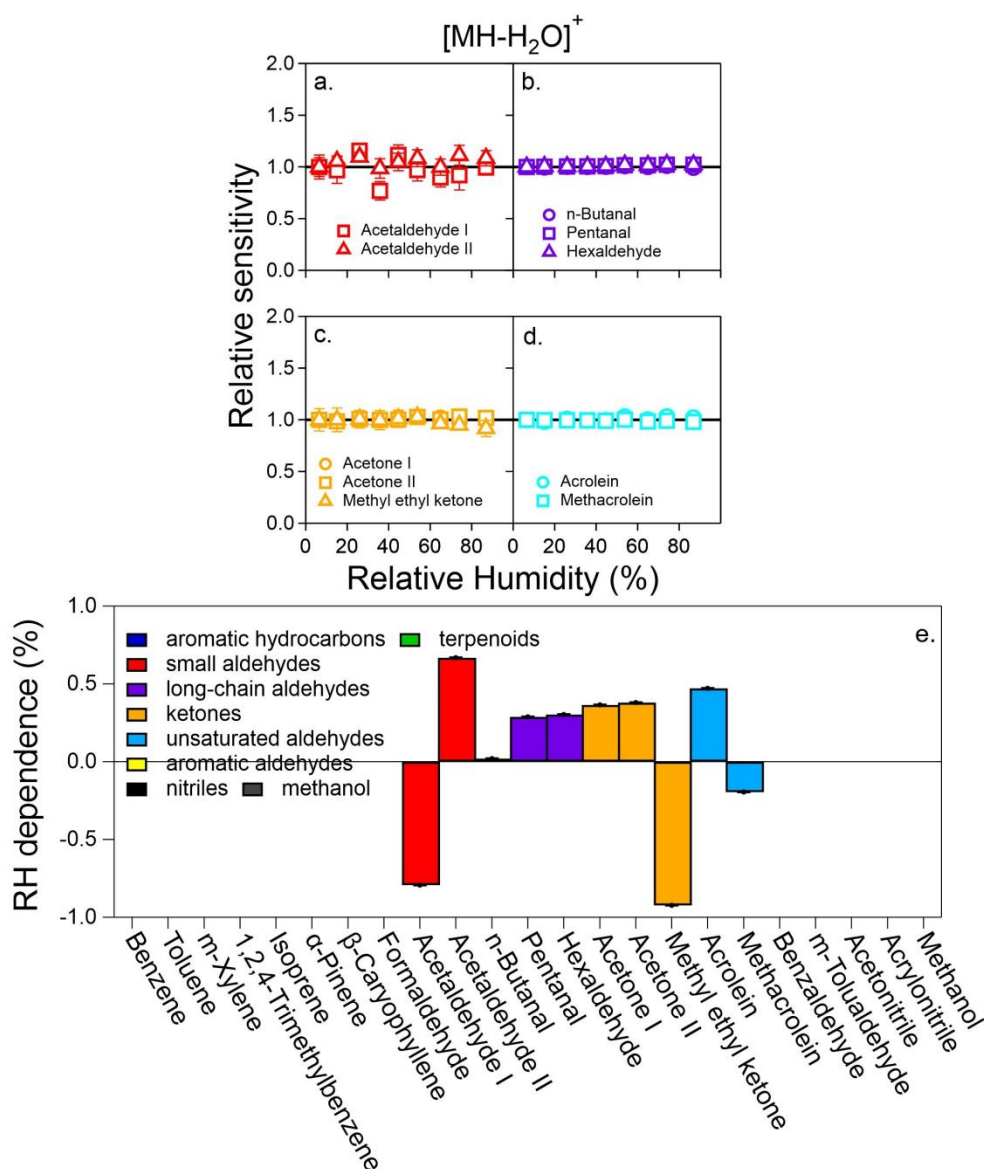

245  
 246 **Figure S16.** The dependence of the  $[MH-H_2O]^+$  signals on RH for the VOCs and  
 247 OVOCs. Panels a-d: the relative sensitivity was calculated as the slope (sensitivity)  
 248 under high-RH conditions to that at the dry (RH<5%) condition. Panel e: the percent  
 249 change of relative sensitivity per 10% RH increase.



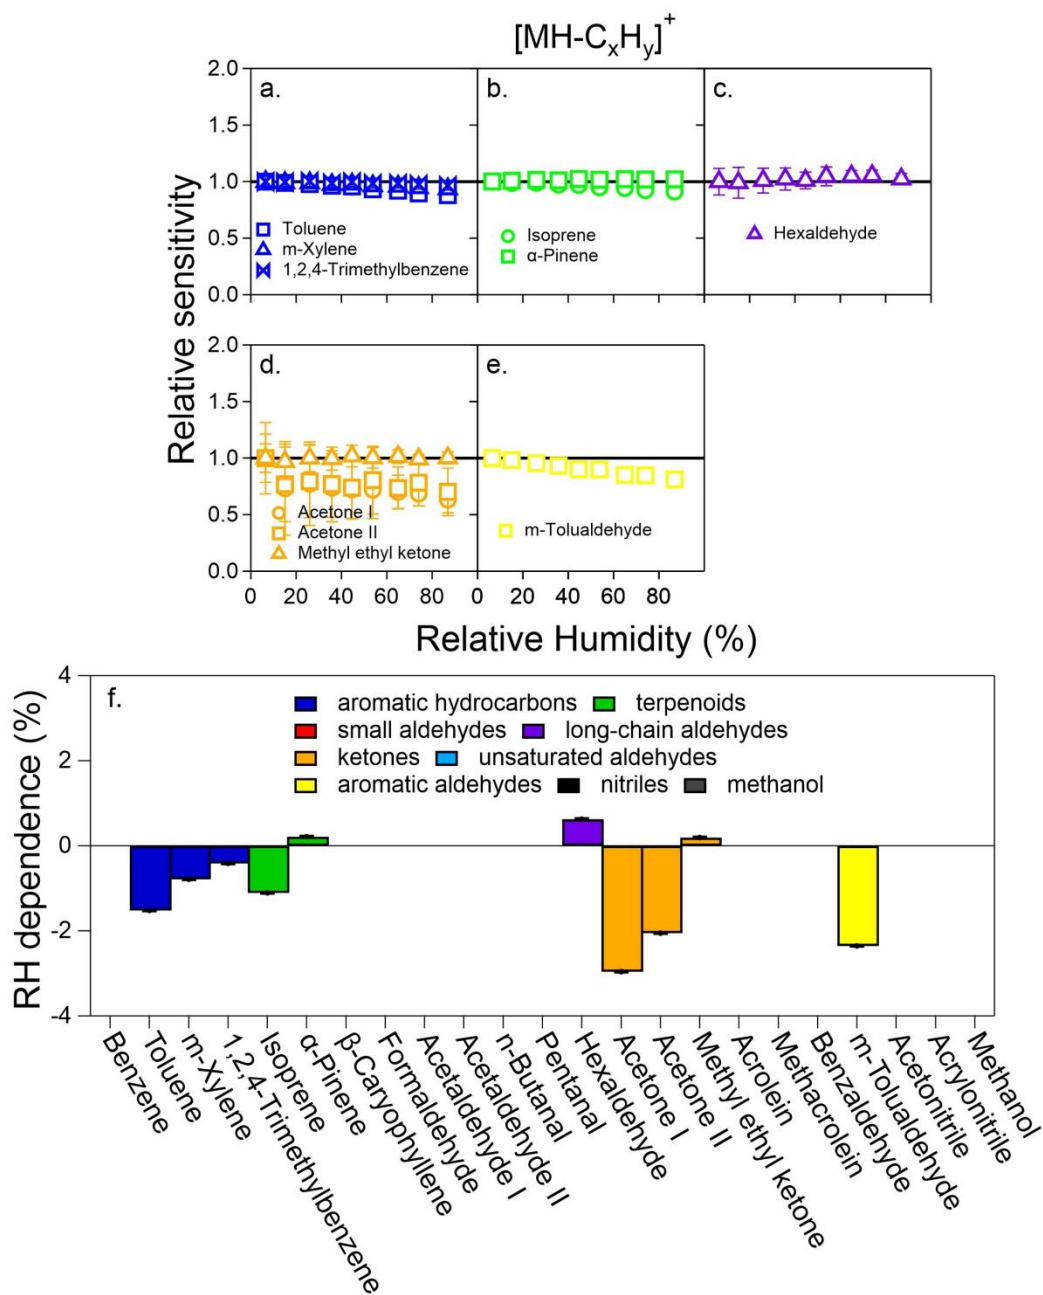

250  
 251 **Figure S17.** The dependence of the  $[MH-C_xH_y]^+$  signals on RH for the VOCs and  
 252 OVOCs tested at a concentration of ~12 ppbv. Panels a-e: the relative sensitivity was  
 253 calculated as the slope (sensitivity) under high-RH conditions to that at the dry (RH<5%)  
 254 condition. Panel f: the percent change of relative sensitivity per 10% RH increase.

255 **References**

- 256 Blake, R. S., Patel, M., Monks, P. S., Ellis, A. M., Inomata, S., and Tanimoto, H.: Aldehyde and ketone  
257 discrimination and quantification using two-stage proton transfer reaction mass spectrometry,  
258 International Journal of Mass Spectrometry, 278, 15-19, <https://doi.org/10.1016/j.ijms.2008.07.010>,  
259 2008.
- 260 Cappellin, L., Karl, T., Probst, M., Ismailova, O., Winkler, P. M., Soukoulis, C., Aprea, E., Märk, T. D.,  
261 Gasperi, F., and Biasioli, F.: On Quantitative Determination of Volatile Organic Compound  
262 Concentrations Using Proton Transfer Reaction Time-of-Flight Mass Spectrometry, Environmental  
263 Science & Technology, 46, 2283-2290, <https://doi.org/10.1021/es203985t>, 2012.
- 264 Jenkin, M. E., Wyche, K. P., Evans, C. J., Carr, T., Monks, P. S., Alfarra, M. R., Barley, M. H., McFiggans,  
265 G. B., Young, J. C., and Rickard, A. R.: Development and chamber evaluation of the MCM v3.2  
266 degradation scheme for  $\beta$ -caryophyllene, Atmos. Chem. Phys., 12, 5275-5308,  
267 <https://doi.org/10.5194/acp-12-5275-2012>, 2012.
- 268 Lindinger, W., Hansel, A., and Jordan, A.: On-line monitoring of volatile organic compounds at  
269 pptv levels by means of proton-transfer-reaction mass spectrometry (PTR-MS) medical  
270 applications, food control and environmental research, Int J Mass Spectrom, 173, 191-241,  
271 [https://doi.org/10.1016/S0168-1176\(97\)00281-4](https://doi.org/10.1016/S0168-1176(97)00281-4), 1998.
- 272 Michel, E., Schoon, N., Amelynck, C., Guimbaud, C., Catoire, V., and Arijs, E.: A selected ion flow  
273 tube study of the reactions of  $H_3O^+$ ,  $NO^+$  and  $O_2^+$  with methyl vinyl ketone and some  
274 atmospherically important aldehydes, International Journal of Mass Spectrometry, 244, 50-59,  
275 <https://doi.org/10.1016/j.ijms.2005.04.005>, 2005.
- 276 Milligan, D. B., Wilson, P. F., Freeman, C. G., Meot-Ner, M., and McEwan, M. J.: Dissociative proton  
277 transfer reactions of  $H_3^+$ ,  $N_2H^+$ , and  $H_3O^+$  with acyclic, cyclic, and aromatic hydrocarbons and  
278 nitrogen compounds, and astrochemical implications, The Journal of Physical Chemistry A, 106,  
279 9745-9755, <https://org.doi/10.1021/jp014659j>, 2002.
- 280 Pagonis, D., Sekimoto, K., and de Gouw, J.: A Library of Proton-Transfer Reactions of  $H_3O^+$  Ions  
281 Used for Trace Gas Detection, J Am Soc Mass Spectr, 30, 1330-1335, 2019.
- 282 Sekimoto, K., Li, S. M., Yuan, B., Koss, A., Coggon, M., Warneke, C., and de Gouw, J.: Calculation of  
283 the sensitivity of proton-transfer-reaction mass spectrometry (PTR-MS) for organic trace gases  
284 using molecular properties, International Journal of Mass Spectrometry, 421, 71-94, 2017.
- 285 Solouki, T. and Szulejko, J. E.: Bimolecular and unimolecular contributions to the disparate self-  
286 chemical ionizations of  $\alpha$ -Pinene and camphene isomers, J Am Soc Mass Spectr, 18, 2026-2039,  
287 <https://doi.org/10.1016/j.jasms.2007.08.016>, 2007.
- 288 "Phase Transition Enthalpy Measurements of Organic and Organometallic Compounds" in NIST  
289 Chemistry WebBook, NIST Standard Reference Database Number 69, last
- 290 Zhao, J. and Zhang, R.: Proton transfer reaction rate constants between hydronium ion ( $H_3O^+$ )  
291 and volatile organic compounds, Atmospheric Environment, 38, 2177-2185,  
292 <https://doi.org/10.1016/j.atmosenv.2004.01.019>, 2004.
- 293
